# Supplementary material for: Exploring the potential molecular targets and therapeutic mechanisms of Cyperi Rhizoma in treating diabetic cardiomyopathy: a computational approach
Source: Royal Society of Chemistry journal article supplement (doi:10.1039/d5ra02505b), 2025-01-01
Supplement: d5ra02505b1.pdf [file d5ra02505b1.pdf]

**Supplementary Materials for:**

**Exploring the Potential Molecular Targets and Therapeutic Mechanisms of  
Cyperi Rhizoma in Treating Diabetic Cardiomyopathy: A Computational  
Approach**

Su-Rui Lu<sup>1#</sup>, Zi-Xiang Fu<sup>1#</sup>, Yan Xia<sup>1#</sup>, Yan-Mei Xu<sup>1</sup>, Feng-Liang Wang<sup>3</sup>, Zhao-Wen  
Pan<sup>1</sup>, Yi-Wei Tu<sup>1</sup>, Wen-Jing Peng<sup>1</sup>, Ming-Li Han<sup>1</sup>, Wei Yu<sup>1\*</sup>, Wen-Liang Zha,<sup>1,2\*</sup>

<sup>1</sup>School of Pharmacy, Xianning Medical College, Hubei University of Science and  
Technology, Xianning 437100, China.

<sup>2</sup>Second Affiliated Hospital, Xianning Medical College, Hubei University of Science  
and Technology, Xianning 437100, China.

<sup>3</sup>Minda Hospital of Hubei Minzu University, En shi 445000, China.

<sup>#</sup>SuRui Lu, Zi-Xiang Fu, and Yan Xia are the co-first authors of this paper.

\*Corresponding to:

Wen-Liang Zha, Xianning Medical College, Hubei University of Science and  
Technology, No.88, Xiannng Avenue, Xianning 437100, China. E-mail:  
xyzwl800@163.com.

Wei Yu, Xianning Medical College, Hubei University of Science and Technology,  
No.88, Xiannng Avenue, Xianning 437100, China. E-mail: yuwei0805@163.com

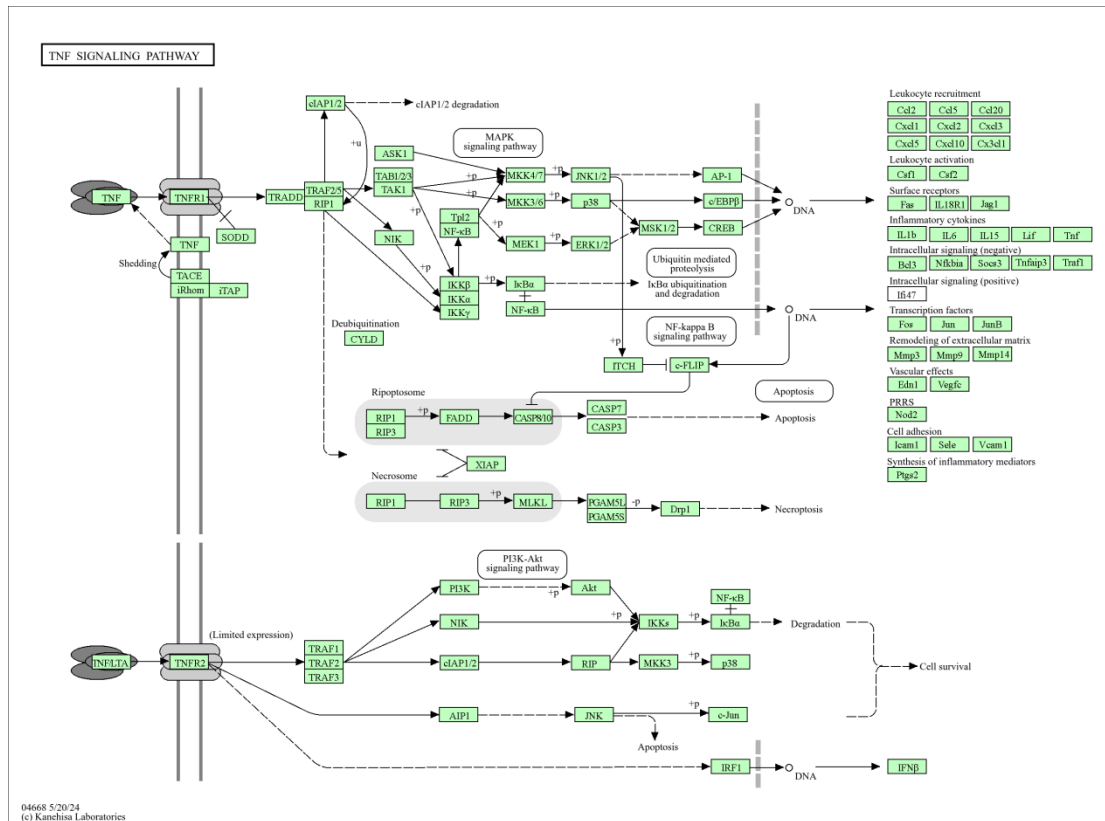

**Figure S1 Map of TNF signaling pathway**

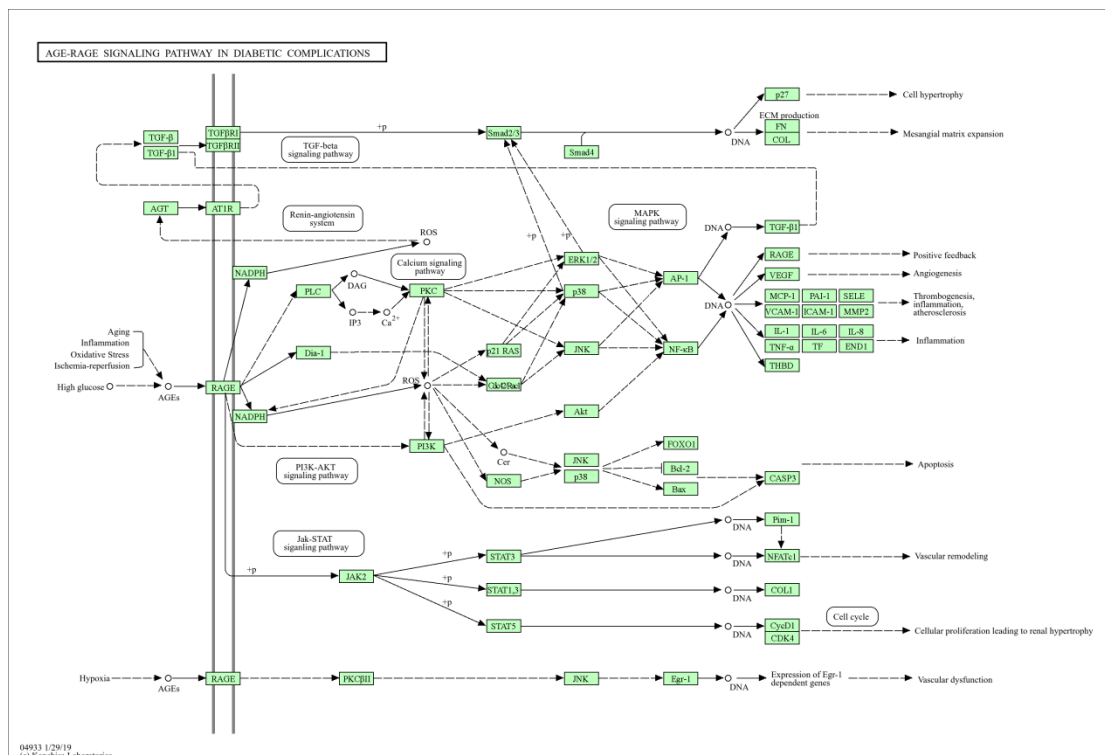

**Figure S2 Map of AGE-RAGE signaling pathway in diabetic complications**

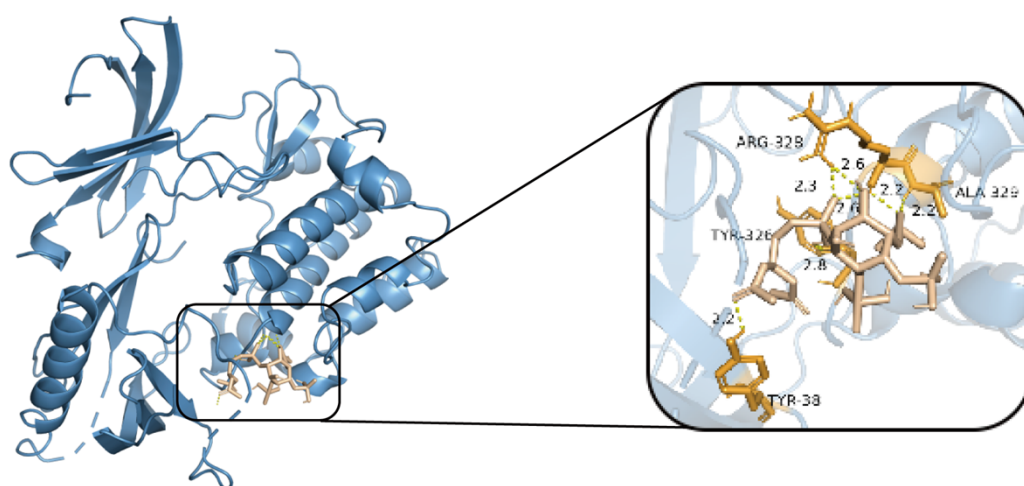

center\_X = 6.29   center\_Y = -7.941   center\_Z = 17.261   Binding energy = -5.6  
 size\_X = 75.25   size\_Y = 75.25   size\_Z = 75.25

**Figure S3 Molecular docking between AKT1 and its natural ligand PIP3**

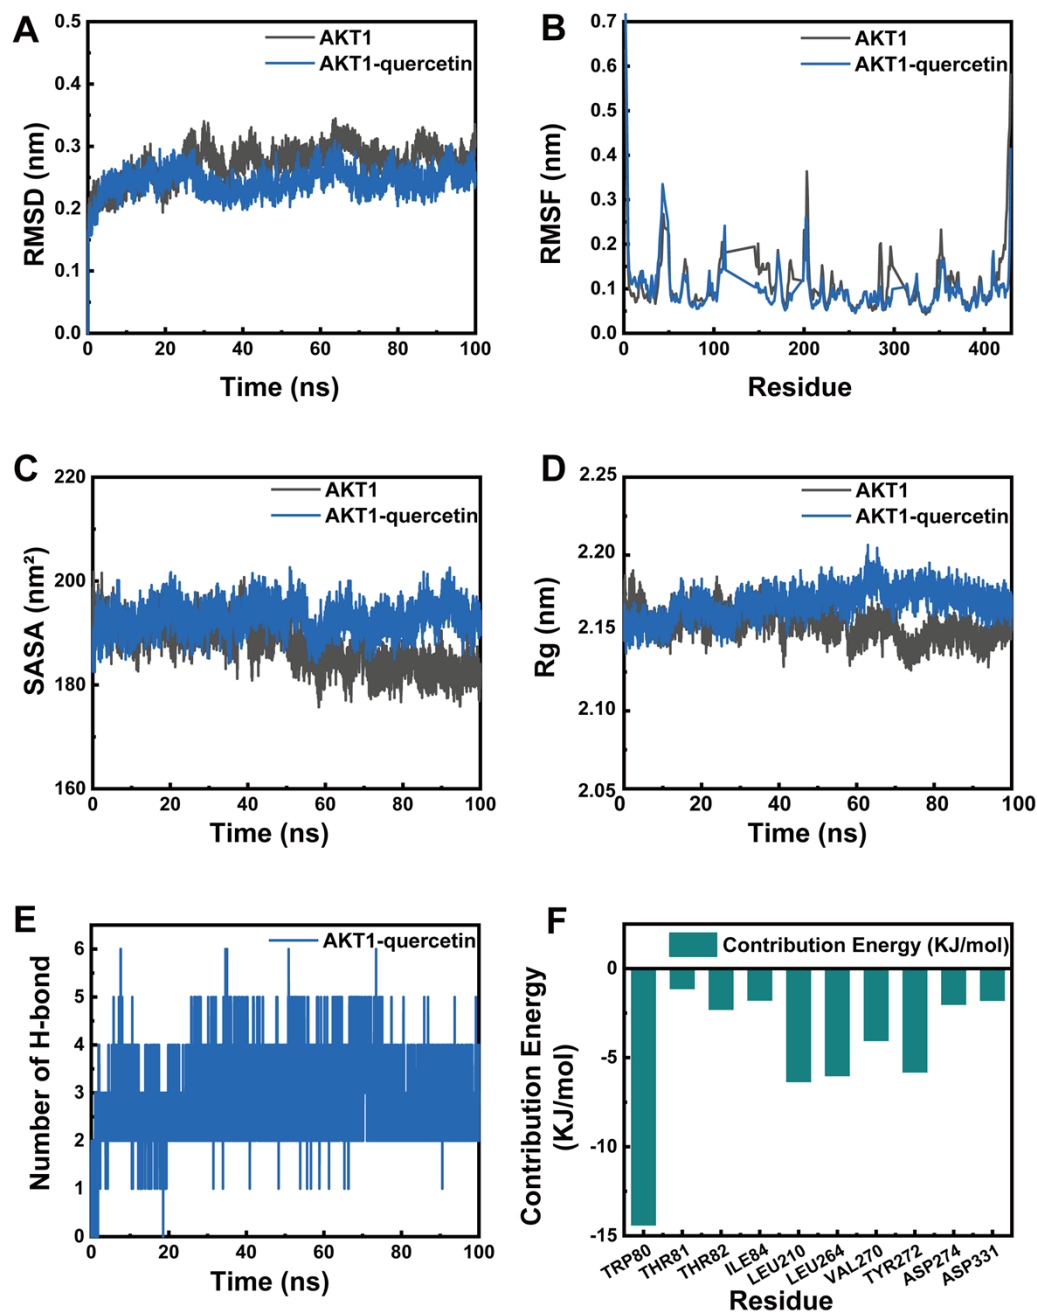

**Figure S4 Analysis of MDS Results**

(A) RMSD of AKT1-querceetin.(B) RMSF of AKT1-querceetin.(C) SASA of AKT1-querceetin.(D) Rg changes of AKT1-querceetin.(E) Number of Hydrogen Bonds (HBNUM) of AKT1-querceetin.(F) Free Energy Decomposition of Amino Acids for AKT1-querceetin.

**Table S1 Protein ligand MMPBSA analysis**

| Energy                            | complex  |
|-----------------------------------|----------|
| Van der Waals Energy (KJ/mol)     | -156.766 |
| Electrostatic energy (kJ/mol)     | -75.610  |
| Polar solvation energy (KJ/mol)   | 161.970  |
| Nonpolar solvation Energy(KJ/mol) | -19.120  |
| Total Binding Energy(KJ/mol)      | -89.526  |
| -TΔS(KJ/mol)                      | 4.473    |
| Total Binding Free Energy(KJ/mol) | -85.053  |

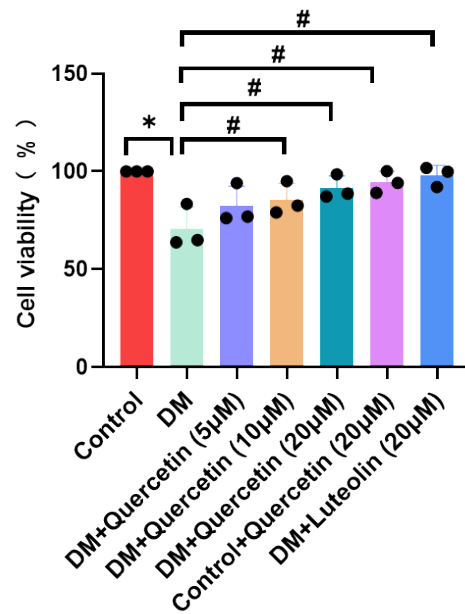

**Figure S5 Impact of quercetin and luteolin on H9c2 cardiomyocytes in a diabetic environment**

Influence of quercetin and luteolin on the survival rate of H9c2 myocardial cells subjected to injury from high glucose and PA, as relative to the Control group, \* $P < 0.05$ ; and relative to the DM group, # $P < 0.05$ ,  $n=3$  different cell batches. \* indicates that there is a correlation between two variables and a  $P < 0.05$  is considered to indicate statistical significance.
